# Supplementary material for: Electrochemical Multiplexed N-terminal Natriuretic Peptide and Cortisol Detection in Human Artificial Saliva: Heart Failure Biomedical Application
Source: Preprints.org preprint supplement (doi:10.20944/preprints202305.1312.v1), 2023-05-18
Supplement: Supplementary file 1 [file supplementary]

Electrochemical Multiplexed N-terminal Natriuretic Peptide and Cortisol detection in human artificial saliva: heart failure biomedical application

El Kahina Ghedir**1**, Abdoullatif Baraket**2**, Messaoud Benounis**1**, Nadia Zine**2**, Abdelhamid Errachid**2**

**1**Laboratory of Sensors, Instrumentations and Process (LCIP), Institute of Science and Technology, University of Khenchela;Route de El Hamma, 40000 Khenchela, Algeria.

**2**Institut de Sciences Analytiques (ISA), Université de Lyon - UMR 5280, 5 rue de la Doua, 69100, Villeurbanne, France.

**Supplementary Material**

**Figure 1S**: Ghedir et al.

**RE**

**WE**


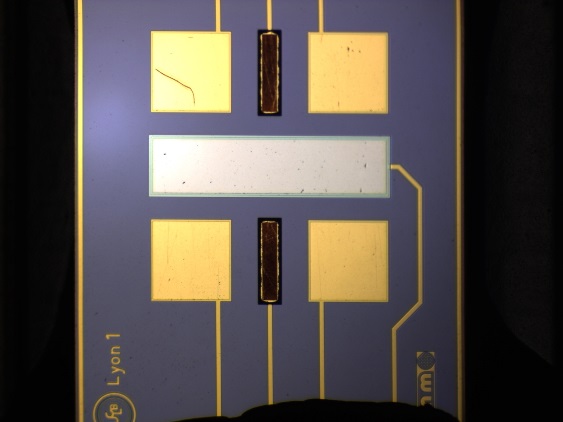

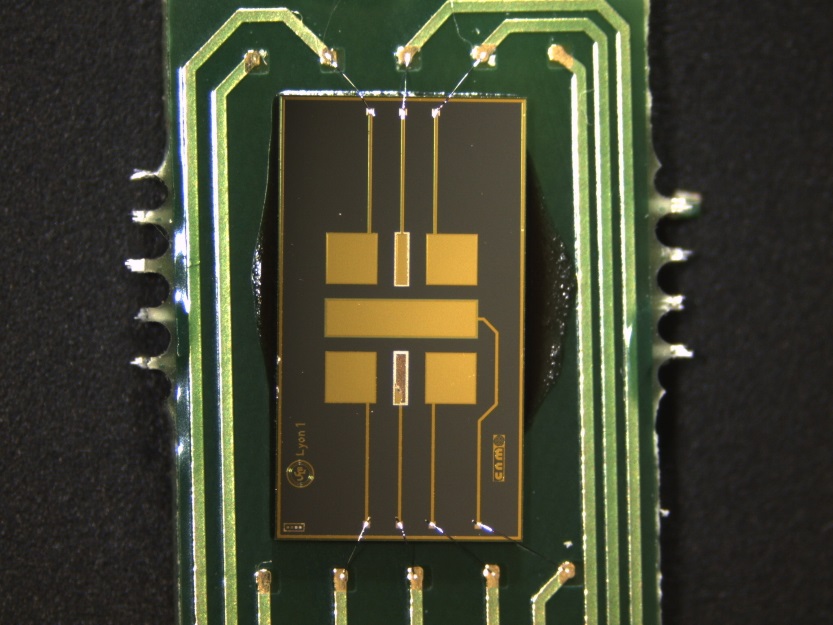

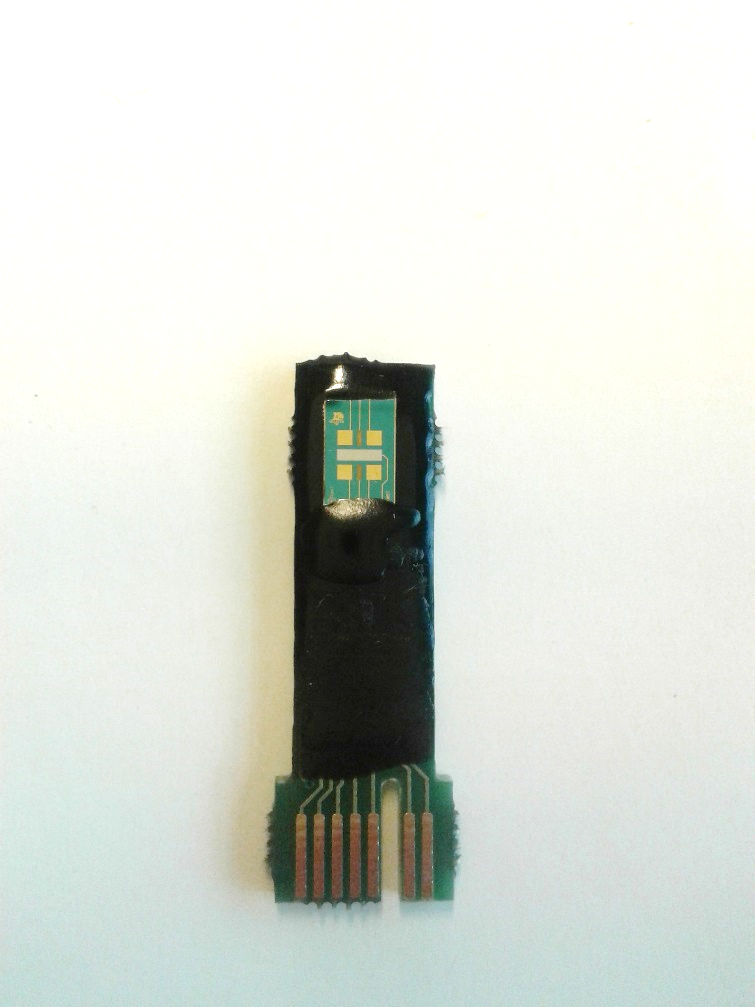


**CE**


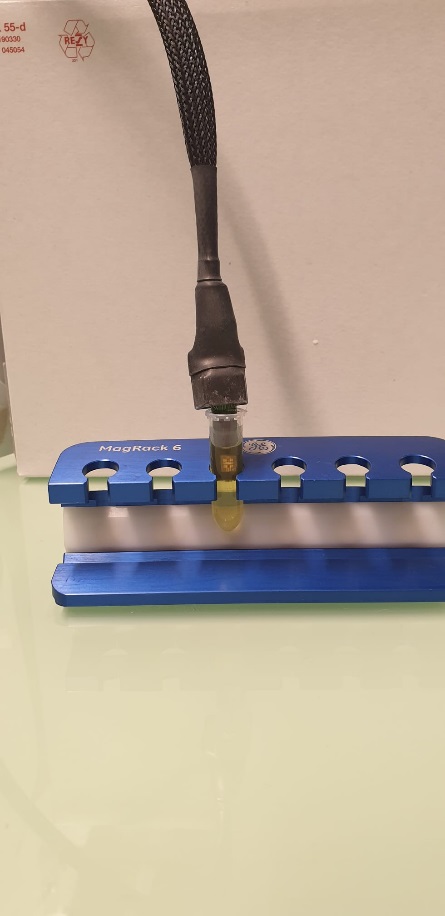


**Figure 1S**: **(A)** Electrochemical biosensor platform sealed onto the PCB board using an epoxy resin (Epo-Tek H70E-2LC, from Epoxy Technology) and the microelectrode pads were wire bonded to the gold tracks of the BCP through aluminum wire (25μm Ø) by wire-bonding (Kulicke&Soffa 4523A). **(B)** The bonding area of the device, the bonding wires, and the gold tracks of the PCB were encapsulated using the same resin (Epo-Tek H70E-2LC) to protect them from the electrolyte solution. **(C)** The biosensor based on silicon substrate sizes 7x4mm and contains four gold WE, two RE and central platinum CE **(D)** The biosensor is dropped in 1.5 mL of ferric electrolyte solution and connected to the potentiostate through sheilded cable to avoid all electrical noises.

**Figure 2S**: Ghedir et al.


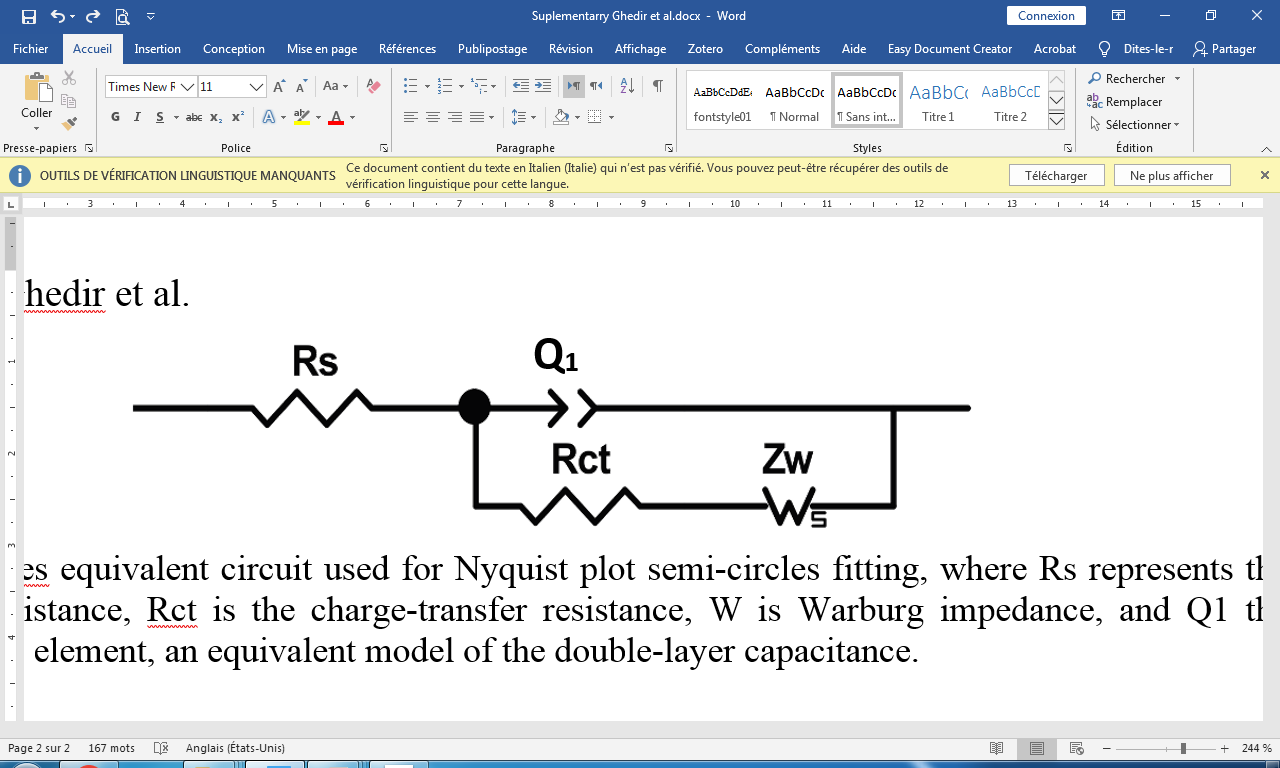


**Figure 2S**: Randles equivalent circuit used for Nyquist plot semi-circles fitting, where Rs represents the electrolyte resistance, Rct is the charge-transfer resistance, W is Warburg impedance, and Q1 the constant phase element, an equivalent model of the double-layer capacitance.
